# Supplementary material for: Comparative Adsorption Characteristics of Methylene Blue on Raw Leaves and Biochar of Guinea Grass (Megathyrsus maximus)
Source: Research Square preprint supplement (doi:10.21203/rs.3.rs-7692254/v1), 2025-10-30
Supplement: Supplementary file 2 [file 63094997ea0cce1ceb7479ac.docx]

- Raw leaves and biochar of guinea grass *(Megathyrsus maximus)* are good biosorbents for removing methylene blue (MB) from wastewater.
- Both raw biosorbent (RG) and its biochar (BG) exhibit more than 95% removal of MB under the experimental conditions.
- The adsorption kinetics of methylene blue on RG and BG of guinea grass follows a pseudo-second order model.
- The adsorption isotherm of MB on RG & BG of guinea grass follows the Langmuir isotherm model, suggesting monolayer adsorption.
- Maximum adsorption capacity of RG & BG for MB is 21.44 mg g-1 & 7.90 mg g-1.
