# Supplementary figures and images for: Comparative Adsorption Characteristics of Methylene Blue on Raw Leaves and Biochar of Guinea Grass (Megathyrsus maximus)
Source: Research Square preprint supplement (doi:10.21203/rs.3.rs-7692254/v1), 2025-10-30

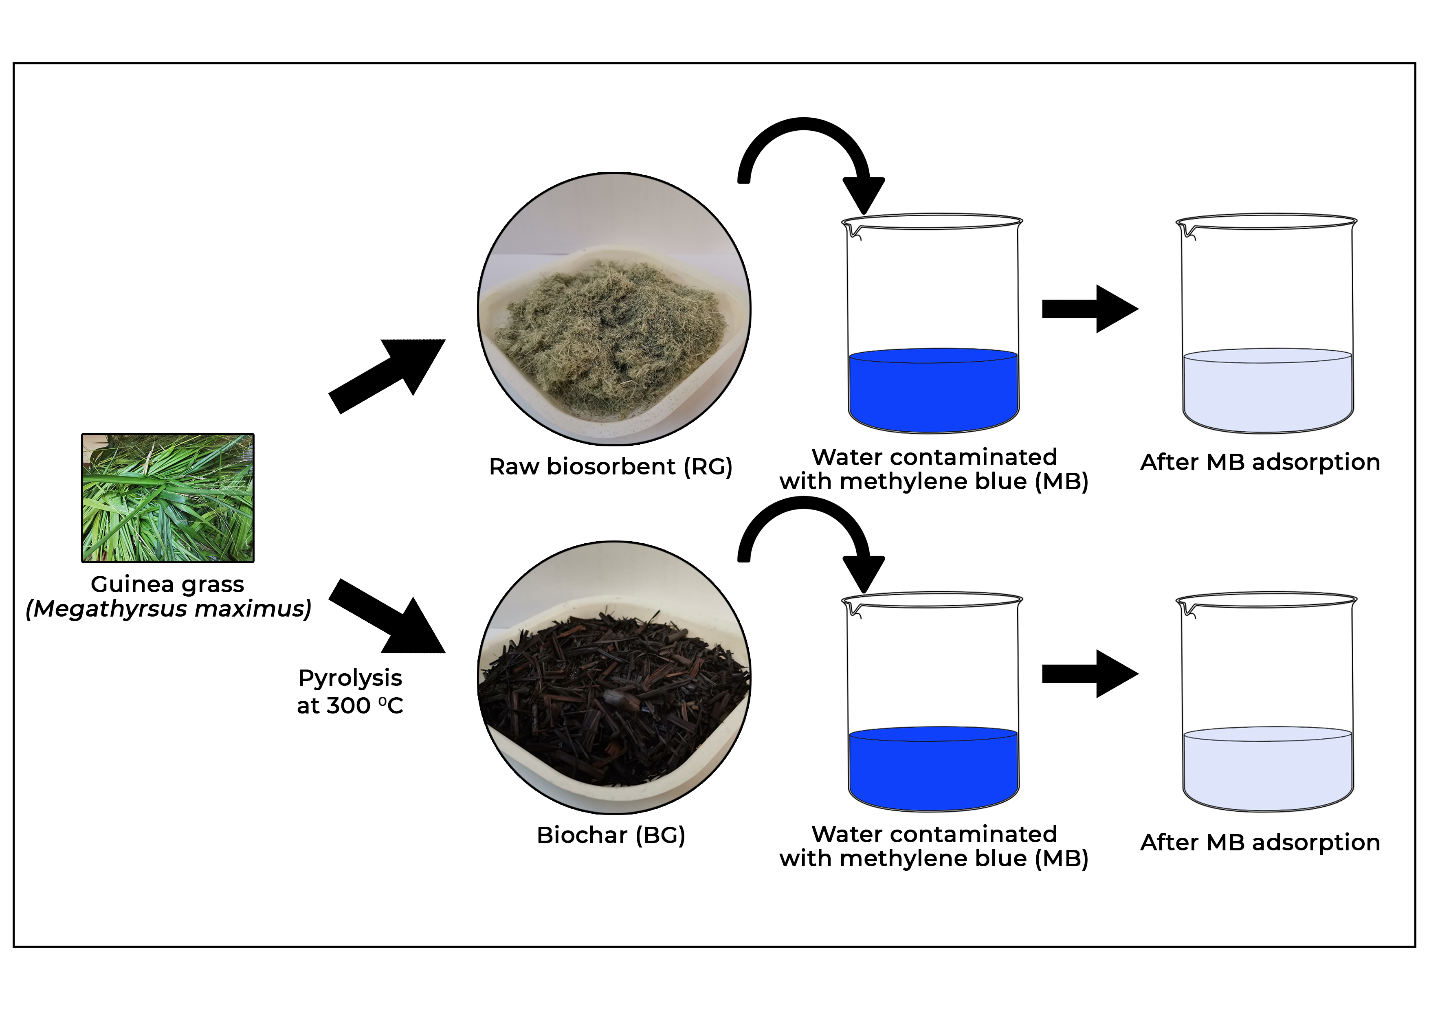

Supplement: Supplementary file 1 [file 4a207046958b3f7e7e2f9262.docx]
